# Supplementary material for: Enhanced mechanical, thermal, and electric properties of graphene aerogels via supercritical ethanol drying and high-temperature thermal reduction
Source: PubMed Central journal article supplement (PMC5431159; doi:10.1038/s41598-017-01601-x), 2017-05-03
Supplement: 41598_2017_1601_MOESM1_ESM.pdf [file 41598_2017_1601_MOESM1_ESM.pdf]

---

**Supplementary Information of**  
**Enhanced mechanical, thermal, and electric properties of**  
**graphene aerogels via supercritical ethanol drying and**  
**high-temperature thermal reduction**

Yehong Cheng<sup>1</sup>, Shanbao Zhou<sup>1</sup>, Ping Hu<sup>1</sup>, Guangdong Zhao<sup>1</sup>, Yongxia Li<sup>1</sup>,  
Xinghong Zhang<sup>1\*</sup>, Wenbo Han<sup>1\*</sup>

<sup>1</sup>National Key Laboratory of Science and Technology on Advanced Composites in  
Special Environments, Harbin Institute of Technology, Harbin 150001, People's  
Republic of China

\* Corresponding author e-mail address: [zhangxh@hit.edu.cn](mailto:zhangxh@hit.edu.cn), [wbhan@hit.edu.cn](mailto:wbhan@hit.edu.cn)

## Supplementary Figures:

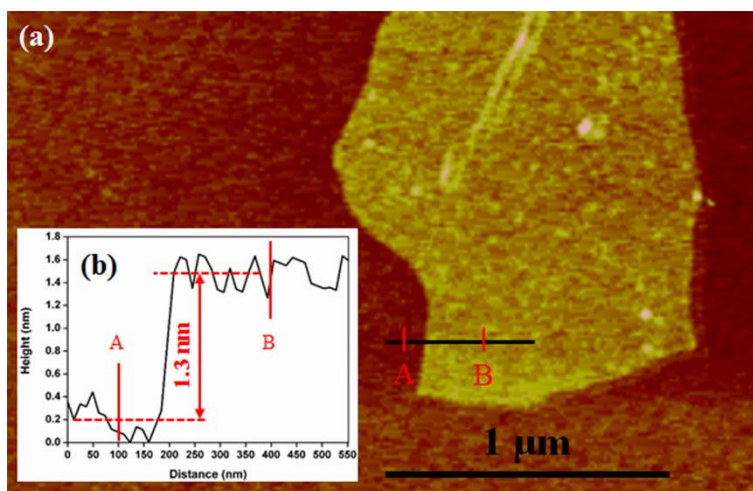

Fig. S1 (a) Atomic force micrographs of graphene oxide (GO) sheets deposited on a freshly cleaved silicon slice surface and (b) the height profile of a GO sheet

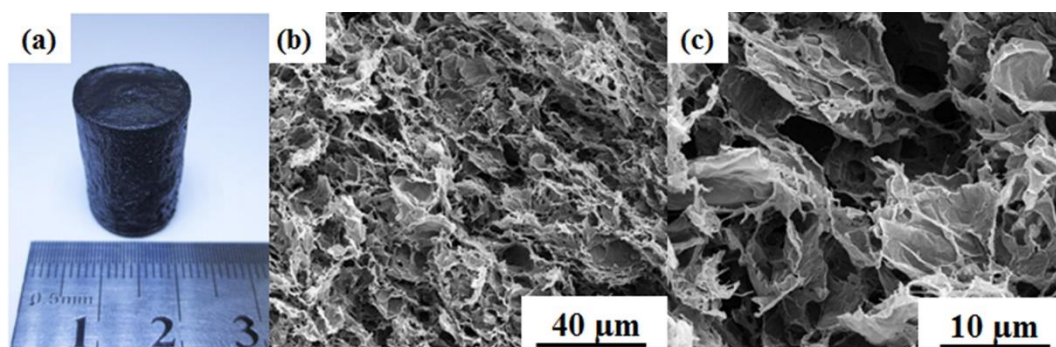

Fig. S2 (a) Digital photographs and (b and c) microscopic morphology of the GA-F prepared by hydrothermal reduction of  $5 \text{ mg}\cdot\text{mL}^{-1}$  GO

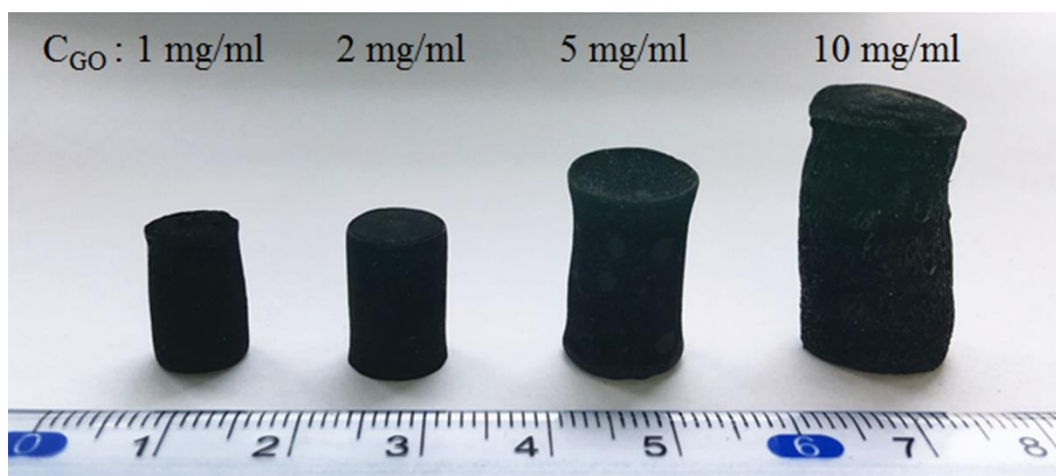

Fig. S3 Digital photographs of GA-S prepared by 1, 2, 5, and  $10 \text{ mg}\cdot\text{mL}^{-1}$  GO aqueous dispersion

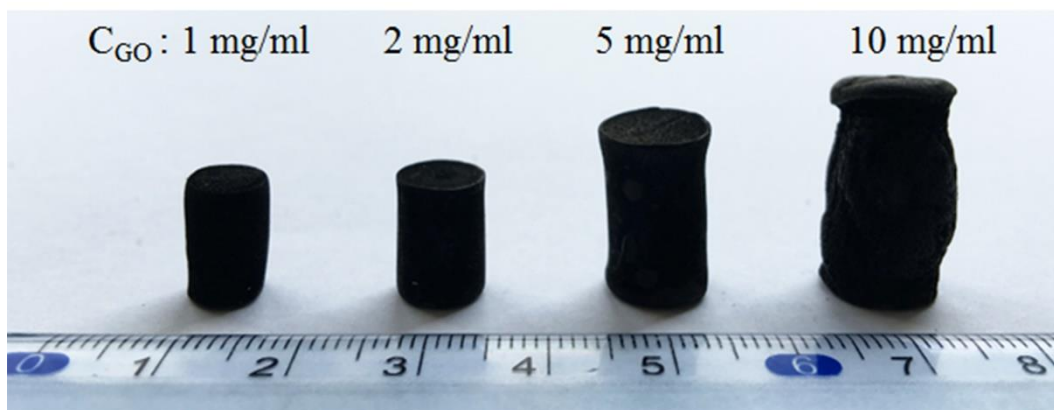

Fig. S4. Digital photographs of GA-S-1500C prepared by 1, 2, 5, and 10  $\text{mg}\cdot\text{mL}^{-1}$  GO aqueous dispersion

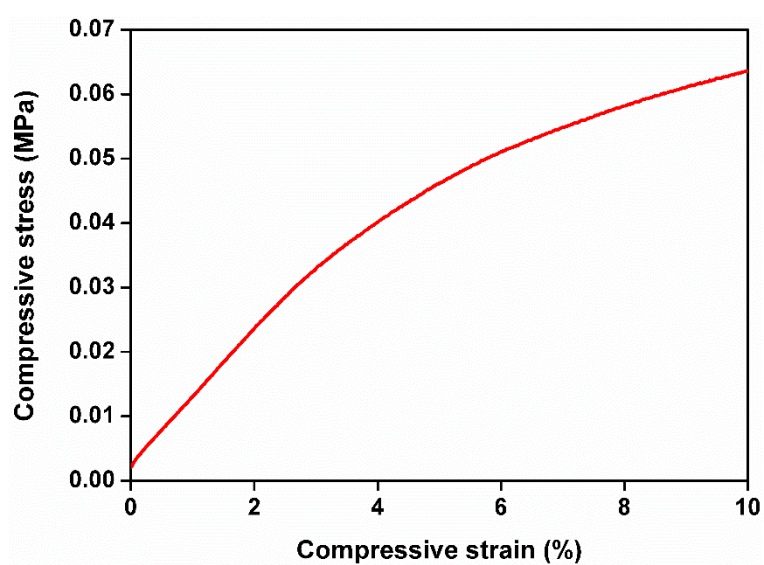

Fig. S5. Mechanical property for GA-F prepared by hydrothermal reduction of 5  $\text{mg}\cdot\text{mL}^{-1}$  GO dispersion

Table S1 The bulk densities ( $\rho$ ), yield strengths ( $\sigma$ ), elasticity moduli (E), Brunauer-Emmett-Teller (BET) surface areas ( $S_{\text{BET}}$ ), Barrete-Joynere-Halenda (BJH) method cumulative desorption surface area ( $S_{\text{BJH}}$ ), pore volumes, and average pore diameters of GA-S and GA-S-1500C with different starting GO concentrations.

| Composition  | $\rho$<br>( $\text{mg}\cdot\text{cm}^{-3}$ ) | $\sigma$<br>(MPa) | E<br>(MPa) | $S_{\text{BET}}$<br>( $\text{m}^2/\text{g}$ ) | $S_{\text{BJH}}$<br>( $\text{m}^2/\text{g}$ ) | Pore volume<br>( $\text{cm}^3/\text{g}$ ) | Pore diameter<br>(nm) |
|--------------|----------------------------------------------|-------------------|------------|-----------------------------------------------|-----------------------------------------------|-------------------------------------------|-----------------------|
| GA-S1        | 22.4                                         | 0.05              | 0.81       | 593.6                                         | 1179                                          | 4.487                                     | 3.822                 |
| GA-S2        | 38.1                                         | 0.14              | 1.70       | 602.8                                         | 871                                           | 2.848                                     | 3.841                 |
| GA-S5        | 56.2                                         | 0.24              | 5.83       | 502.1                                         | 860                                           | 2.369                                     | 3.834                 |
| GA-S10       | 84.1                                         | 0.74              | 13.84      | 435.6                                         | 516                                           | 2.153                                     | 3.817                 |
| GA-S1-1500C  | 26.8                                         | 0.08              | 1.02       | 336.5                                         | 510                                           | 2.716                                     | 3.791                 |
| GA-S2-1500C  | 47.0                                         | 0.17              | 2.04       | 384.0                                         | 770                                           | 8.305                                     | 3.776                 |
| GA-S5-1500C  | 63.0                                         | 0.31              | 6.96       | 423.1                                         | 674                                           | 5.733                                     | 3.771                 |
| GA-S10-1500C | 94.5                                         | 1.05              | 17.29      | 440.8                                         | 905                                           | 7.125                                     | 3.784                 |
